# Supplementary material for: Identification of Differentially Expressed Genes Reveal Conserved Mechanisms in the Rice-Magnaporthe oryzae Interaction
Source: Front Plant Sci. 2022 Apr 5;13:723356. doi: 10.3389/fpls.2022.723356 (PMC9016282; doi:10.3389/fpls.2022.723356)
Supplement: Supplementary file 21 [file Table_15.XLSX]

## Sheet: Sheet1
Table S15 Verified M. oryzae effectors
Symbol	Uniprot ID	GeneID	Protein Sequence	STEM Profile	Homology genes
Iug6	A0A0A7DLN4	MGG_10074	MQFSTIQLFALMAVGAMANTVAPADVAAVDAPRAPLLVRRNCEGKNTQAECERFKWLTGCTWLRGSKYCSST	-	-
Iug9	A0A0A7DM22	Mo_GLEAN_10000765	MKFIYSTALISVLAVAIPTGRGLTSGLMRRESGEVSTNYIFTDDPAEGGKTTQKKKRESGEVSTNYIFTDDPAEGGKATQ	-	-
AvrPi9	A0A0A7DMM3	MGG_12655	MQFSQILTVLFLGVSVSALPAGGLPGSPGSAVQRCHCPPRGSHAHGSLAAREEAPEAEGDAKISARYTCPNCHKTGKGCDDGWCQVEKTHW	Profile_10	-
AvrPib	A0A0H4ITX1	MGG_12426	MRSSTTFITIAFIAMQALGIAATQVTILKKGERITWVEVPKGESREFNIRGKYFTVSVSDDGTPSISGSKYTVE	-	-
SPD9	A0A151V4M0	MGG_07955	MQFNNIVLLVAAMAGFALAMPAPKTQPFQCPDGFSVVKNACFPDLGPDGDHS	Profile_21	MGG_17154 MGG_08331 MGG_07955 MGG_08424 MGG_08401
MoCDIP5	A0A151V4Q6	MGG_03643	MAVARTPGRQQTNMQLTTILTTALACASTASAALNWSLQKASNPTTDQADAYNRIETAMRDAVARYHRHSPNASKTIRVYYAPGVPTAEASFNGDLRFGTNRAYMNTRTAMHEISHTLGVGTTNAFNNMCSSGNWPRALPLLRSFDGQGAVINCGGSHFWPYGLNYDNEWSETNAERHVRMVDAMIQDGIGR	-	-
PWT3	A0A224A3F0	MGG_14708	MNLRLITFLMTSVAGAVASDFWKVDLYGPPQGHSNVKSEIVATVVCGDGRKANLSYTHSWRGDSTTKTITIRCRITPKVIKGGPLPPYYELKAEPIWAGDERAIAAAKREQEERVLEQFELMNLMMDASEDPKARRLFASP	-	-
PWT4	A0A224A3U7	MGG_16551	MRIQYFLPFLVADILAMSKPPSDSTDASKIPTYKIKHPGPRYIITDDGRVVEVERKESGRYQLIDGVLVRVEYEKKTGGSEGSKTSTNTRGPK	-	-
AVR-Rmg8	A0A286T6A2	-	MHRIGFFFPILIAGAMALPAPQPMPPSRPGQGGRGGNGGRGPGGPPPQQYEEPVPYHQTAAAAWQPYPGHVPGGQRPTEHSELIPDDYPQFVKDYDTYFFGGLPGTRRQ	-	-
SPD4	A4UBM2	MGG_14422	MNFPFKRRSRLVLILLFSCCWSLYTHHLTVDSHCPSLRSAVASRPGRQEVLEHNPCRKSDALVVITKNDESVPP	-	-
AVR-Pita2	A7J0U9	MGG_15370	MLFYSFIFYFHTVAISAFTNIGTFSYPVYNSNPIPNHIHGDLKRRAYIEPYSQCSNSQDSEIRAALKSCAELASWAYHAVENDNRLFELIFKTDSTNIKNWVQNNFNEIHKECNRDADEISLSCHDTSVYTCVREGVHLLGYAKMYEKQVVLCPHFFDHPVNSREITAQNQDTVILHEMLHIILNEWEDYGYEWDGIHNLDSTTSIKNPDSYAIFAQCARYKYC	-	-
AVR-Pita3	A7J0V0	MGG_15370	MLFLFILGYLYTPATSAFINTGTFLQPINNYKEFSNDIHGALNKRAYIQKGSQCSSSEASEIRGALESCAVLAQHAFHAVKSDEELFEFIFKTDSTDIQDLVEQNFKKLYEECSRKEDEVYITCEDETGKCKENQGYKNVLGYARIAKEQIVICPNFFNQPESSSEITATNQDTTIMHELAHIILDLPEDFGYEWTGVHKLDSTKSIKNPDSYVIFAQCARYGSCY	-	-
Cf_Ecp6	B3VBK9	-	MQSMILFAAALMGAAVNGFVLPRTDDPDCETKATDCGSTSNIKYTVVKGDTLTSIAKKFKSGICNIVSVNKLANPNLIELGATLIIPENCSNPDNKSCVSTPAEPTETCVPGLPGSYTIVSGDTLTNISQDFNITLDSLIAANTQIENPDAIDVGQIITVPVCPSSQCEAVGTYNIVAGDLFVDLAATYHTTIGQIKALNNNVNPSKLKVGQQIILPQDCKNVTTAVA	-	-
Avr-Pii	C4B8B7	MGG_10556	MQLSKITFAIALYAIGIAALPTPASLNGNTEVATISDVKLEARSDTTYHKCSKCGYGSDDSDAYFNHKCN	-	-
AVR-Pik-km-kp	C4B8C1	MGG_15972	MRVTTFNTFLLTLGTVAVVNAETGNKYIEKRAIDLSRERDPNFFDNPGIPVPECFWFMFKNNVRQDDGTCYSSWKMDMKVGPNWVHIKSDDNCNLSGDFPPGWIVLGKKRPGF	-	-
AvrPiz-t	C6ZEZ6	MGG_18041	MQFSTIITVCLFTGLASASFVQCNHHLLYNGRHWGTIRKKAGWAVRFYEEKPGQPKRLVAICKNASPVHCNYLKCTNLAAGFSAGTSTDVLSSGTVGSIGNDPQAQRQ	-	-
Msp1	G4MKI0	MGG_05344	MQFSNILSIFTLAAAAQAVSVSYDTGYDDGSRSLTAVSCSDGANGLITKYGWQTQGQIRNFPYIGGVDAVGGWNSPSCGTCWQLTYNGKSINVLAIDHASGFNIGLAAMNDLTNGQAGSLGRIEAQSQQVGLNACGL	-	-
MoCDIP2	G4MML4	MGG_05531	MKFNSGLLAGAAVLVAGVATAQDCISVALSAIPSCAQPCFLNGAPTIGCSGTDFKCQCQQQAKMFAAVESCVQKSCPESEFQKTIDGSDKVCTCASGGPASNNAGGAGNTVNPSSFIPGPTSTASPTTTVAAPTGTPSGRPSAVPTAAANMAAVECSIVVGAVGGALWVALGL	Profile_25	MGG_05531 MGG_09570
SPD10	G4MPQ6	MGG_11991	MQLLNIVLPLLLAGLVSAQAQCFDDLDCLFSGIENAKCAKATNTDLLGYETPPPCLLFTPKILGISADLFHNQSASRTCKGPA	-	-
MoCDIP4	G4MVX4	MGG_08409	MKSTTFLSLLAAPLAAQAHYIFSIVFVNGVQKGGDYTYIRKNSNTYMPSFTNDIVNSPDLRCNTGARANSGTQTLTVKAGDKIGFKLWYNEFIEHPGPGFVYMSKAPGSVASYDGSGDWFKAYETGLCGGQPNSDGAWCTWQKDRIEFTIPPRTPPGEYLVRVEHLAIHESHVGKGQFYMECAQFKVEGPGGGSPGPLVKIPGLYKASDPGIAYNKWTNNPARYVMPGPAVWADNGSSNPSNPPSNPPSNGGGGGGGSGSGAPLYGQCGGEGWTGPKTCAQGTCKVSNQYYSQCL	Profile_21	MGG_07686 MGG_09709 MGG_07300 MGG_08020 MGG_12733 MGG_08254 MGG_08066 MGG_02502 MGG_11948 MGG_06069 MGG_04547 MGG_12696 MGG_06621 MGG_07631 MGG_16043 MGG_04057 MGG_13622 MGG_09439
MoCDIP3	G4MX34	MGG_07986	MHPNTILLIAAGLLNGTAAFRCAIGSAGSCTFRKMPTEELTRCAITCNVRGLFAECSCPLNFPNRAEWIDTMRNECITQTQFSFRSQCQNADPNRVIRIKRPAELDSVSGLEE	-	-
BAS113	G4N0X0	MGG_05785	MKFTFVSSALLALVSSAAAQAPPVPQPLTADWLLNKAGNNSLFTRWRPRSHFIAPSGWMNDPCGAVHDPATDTYHLHYQFHPNHVGWGNVSWGHAVSKDLFHWTDVGGWENDTAVSLAASHYKTSPLSVFTGTTQPVNLQGEHDGTLLTFLTGIHRLPTNWKIHYQNGTEVQALFTSKDAGLTWQEQGIAIPGPPEGWNVTGFRDPSFFPNPDLDAMRNVSEPHYYAVLGSGLKGPDVPAELPGAARPGYIGPRMPLYTAPASNLTDWKFLGALWEPAANSSLGNPDVTGSFGYNFEVSGLFELKANGSDDGAFFVTTGAEGGNTTRHVREQWAVWARGNLSPRANGSIELKPSSGGAVDWGLSYAQASFVDSRKGNQERRVMWGWANEDIEDDVELAV…	Profile_29	MGG_10748 MGG_05785 MGG_07837 MGG_17302
SPD2	G4N480	MGG_12942	MKPFTILATLLTVAGFTAAQSCRQLSADFCQCGTYCYRTRDGGCNPAGTFYGLCPLKRETTFEA	Profile_21	-
MoCDIP1	G4N8Y3	MGG_03356	MARFTSLIAAVLATIGAVKAQCGAGNPDARVTGSGNNFQAVRGSNTVYSGSDYRAAIQAALDSIGSGQRVAVIASGSIGANTISISSGKTFEGCGTINVGNRNGRGAIESLNTQGVKIPYLTMTGNPYFGLRFYGTRDLTLGQITMNLSGGLGIRFDRDNPDNFNVRMGTITVTGAGSHAVETWNIDGLVIDRVIARNVGESGLLVQKTRNAQIGIVDGNNVGTGTGYATLRFANNNGQNPNGNYNTNIWVDQVISRGGGRGVFCVSQSGAAVIRTVDLAKNGNNAILIENCYNLSIRGGTVNGGGEVRVAARSEFPNNRDLWITLRVDNTSVRESPCGTNVNWSLTGNGQRALC	Profile_21	-
SLP1	G4N906	MGG_10097	MQFATITTLLFAGVAAAMPQATPTSAAPPSATSTCTPGPVVDYTVQGNDTLTIVSQKLNSGICNIATLNNLANPNFIALGAVLKVPTAPCVIDNISCLAKQSDNNTCVSGVSPYYTIVSGDTFFLVAQKFNLSVDALQAANVGADPLLLQLNQVINIPICKN	-	-
BAS107	G4N9C5	MGG_10020	MHAFKFVQIWALLAIGAAAIPTPINLPAALTSQLEPRAEGGASAGDANNIQPQSQEKSPFICVWCGKDKGGSSALIGHEIHNHQDDEMVAWTGRDRRLNKYETDKEGYRYFKKYPGVRLPNRTWKGKGKRPE	-	-
MoHEG16	G4NBY8	MGG_01149	MQLLFALLMAAVLVAAQSGSYGSNIDGLISQVPQCAFNCLAEAAESSSCGLTDIRCMCGRISLVSGTSSTCLSKACSADQLATLSSTISKVCADVGAPDPAAAKTATSNDTVPAASAVPTPSQTAVATRLKLQMATVAMFAALSVNIV	Profile_25	-
BAS162	G4NI07	MGG_09379	MRSQALLAVLYASGAIAGGGTYIPKDPALAHRAPEKFPWSGLLNNPFMTKPVIWYQIGQIKIWTDTRDVTYVRDGTKFDTYDQCLSHCLKYSVFNKSKARSSGSQGQTSEYRGRRMHH	Profile_10	MGG_16026
MoHEG13	G4NI08	MGG_09378	MLSLKTLLLVSVSCLAQLAAAHPLDNGGLEPRQQKICSPNGHTDGDLTNPNSLCTLCNSGCQRVAGQPACCS	Profile_28	MGG_17319 MGG_09378 MGG_17582
MoNUDIX	G5EH10	MGG_14344	MKSSLFYLTFGLVPAILAAPGKPGSSYDASGSRHRCGVVPFHGTSEVWMVPSKESGWILPKGGLDVQDGGDWETCVRREAREEGGFTLGPVEYLGTFGDIVWYKGTVTHKSDPTDPEVKARGPAKHFTISDARGYLTGYGKKKDAMLEALNAATRG	-	-
BAS3	G5EHH0	MGG_11610	MQFSTVSFAIFAILPAMVAAMPAETSPVPKPALPVFEELCPDAERQKCAESTDNLKRCLQINGASICVIDCGSQTTCRTQCKQQLKNEKANGFCTVGDNPCICNLNGAANSAH	Profile_10	MGG_16382 MGG_16415
BAS1	G5EHI7	MGG_04795	MHVFNFAALFTVLATFTATAAAADQGSNTFDQRYQGYPWRPANGPIREEKQENVGHRRGGAEYFTSGSPSIAAEDYSAKNAPSRFEQWKAQQKERAERKQDRGLNGIRRVENYYP	Profile_10	-
BAS2	G5EI08	MGG_09693	MVRVSTFAAILAMALSVTANVTPNDAGAKNVGTGNGQQFITGGCVNGTDCQSRCCAGNGENKGVCSNEVAANQNGKTGCGFEDPNKAQTVKEAKEQVKKQGF	Profile_10	MGG_07969 MGG_07749
MC69	G5EI17	MGG_02848	MKAAFVLALCASLASAWVVITPITKEMVVDRSPDDCFFGVVTPQGCGPLRGPAK	-	-
BAS4	G5EI20	MGG_10914	MQLSFSAIAILLAFAVNHATADSHQNLVCVRTYPDNNSAENLEATRCACDWLKKNGKCDDCTIWENRLCHSDAKSLDGNEFEDACVRKCPNLGATGSSIPPA	Profile_10	-
SPD7	G5EI30	MGG_10335	MQVGQLVFVAIGLSLLHVVIAATDLTETDTIAGADTRLVPGCLVKLYRPPKYIGCFDRSILVGAKCIPVQTTWKIKGHDISVWNGCSTVKGINLPKGWFVKGESAQCKVWHRKQ	-	-
PWL2	Q01144	MGG_13863	MKCNNIILPFALVFFSTTVTAGGGWTNKQFYNDKGEREGSISIRKGSEGDFNYGPSYPGGPDRMVRVHENNGNIRGMPPGYSLGPDHQEDKSDRQYYNRHGYHVGDGPAEYGNHGGGQWGDGYYGPPGEFTHEHREQREEGCNIM	-	-
PWL1	Q01145	MGG_13863	MKFNKTIPLYILAFFSTAVIAGGRKWTNKVIYNDKGPREGSISIRKGAEGDFNCGPGYPGGPDRMVRVHEDNGNIRGMPPGYRLGPDDKEDKGDNQYYSRNGYHVGDGPAEYQNHGGGQWGDGYYGPPGQITNQHGKRQGDQGCHIM	-	-
PWL3	Q01150	MGG_07398	MKINTSILALTLALLPGMATAGRKWLNKKLWDANGQSAGSVSIVKGGQGSINTDTGPITAEGSYDIYERNGKIEGGPPGYKYTEDRYEDRKDDRYYNTHGYHVGDGPAEYGNYGGGHWGDGYYGPPGEFVKTSEYDD""27" "<!DOCTYPE html SYSTEM \"about:legacy-compat\"	-	-
Um_cmu1	Q6L8Q0	MGG_01710	MDTIIDLKDASKALDLGNIRFQLIRLEDTITFHLIERVQFPLNKSIYQPGAIALGSDANLSFMDWYLQEQEKLQSLIRRYEAPDEYPFFPDALQKPILKPLDYPKILHPNDVNVNEKIKRFYIERFLPAVCPDFGRGDGGELDENYGSSATCDIACLQALSRRIHFGKFVAESKFQSDPELYTRLIKAGDRDGIGESITNAAVEKQVLARLRLKAQTYGTDPSSTNTTGAGKINADAVESMYRDFVIPITKEVEVEYLMQRLE	-	-
ACE1	Q6ZX14	MGG_12447	MRDEMWNTATEPIAIIGSGCKFPGGSTTPSKLWELLKDPKDIVSEIRPDRFDVDKYFHPDHKHHGTSNVRHSYFLEENFKHFDAKFFGIRPQEAMAMDPQQRFLLETVYESLEAAGITISDLKGSQAGVFVGNMGVDYSELLSQDIDAFPTYFAPGTARSILSNRISYFFDLHGPSVTVDTACSSSLVAVHQAVQSLRLGETPVAIVCGANLLLGPAQYIAESKLQMLSPNGRSRMWDASADGYARGEGFASIVLKPLSVALANGDHIECIIRETGCNQDGRTKGITMPSPLAQCKLIQETYKRAGLDLSKSSDRPQYFEAHGTGTPAGDPVEAEAISTAFFGPESGFRRTSHDPKLYVGSVKTVIGHTEGTAGLAGLIKASLAMKAKSIPPNLHLERV…	-	-
AVR1-CO39	Q8J183	-	MTNKYPVKSTCCSIIFNEASIYCQGKFINGTSVLPPLDNSVLCKR	-	-
AVR-Pita1	Q9C478	MGG_15370	MLFYSLFFFHTVAISAFTNIGTFSHPVYDYNPIPNHIHGDLKRRAYIERYSQCSDSQASEIRAALKSCAELASWGYHAVKNDNRLFRLIFKTDSTDIQNWVQKNFNEIYKECNRDADEISLTCHDKNVYTCVREGVHNLAYALINEKEIVICPPFFNNPVNSREITAGNQDTVILHEMVHIILKEWKDYGYEWDGIHKLDSTESIKNPDSYAIFAQCARYKYC	-	-
AVR-Pia	R9RX08	MGG_08506	MHFSTIFIPFALAALKVSAAPARSCVYYDGHLPATRVLLMYVRIGNTATITARGHEFEVEAKDQNCKVILTNGKQAPDWLAAEPY	Profile_10	-
Avr-Pi54	V5ZDU1	MGG_03685	MQFTATIISILATAATVLAAPVEVASATPLEARACKTVAASPSGVWVSKNAPQWVGFWVPTDAVGACELKAVFPAGFPIAGTRPQVNIIDVNGPAPGSIVGTVTFTPGTSTTINSFACRQDMQYKLEVASWQAQGSVSYPAQHGTGLILTYGC	Profile_4	-
